# Supplementary material for: Development of a Hallmark Pathway-Related Gene Signature Associated with Immune Response for Lower Grade Gliomas
Source: MDPI journal article supplement (doi:10.3390/ijms231911971), 2022-10-09
Supplement: s1 [file s1]

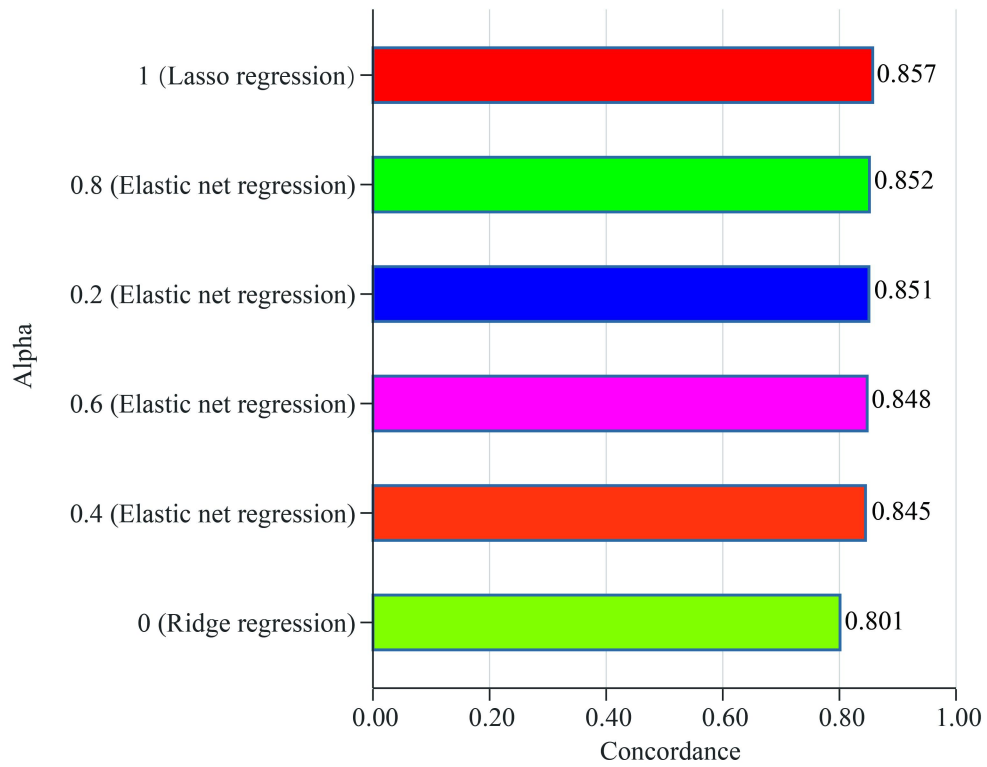

**Figure S1.** The comparison of LASSO, Ridge and Elastic net regressions in the prediction of prognosis for LGGs.

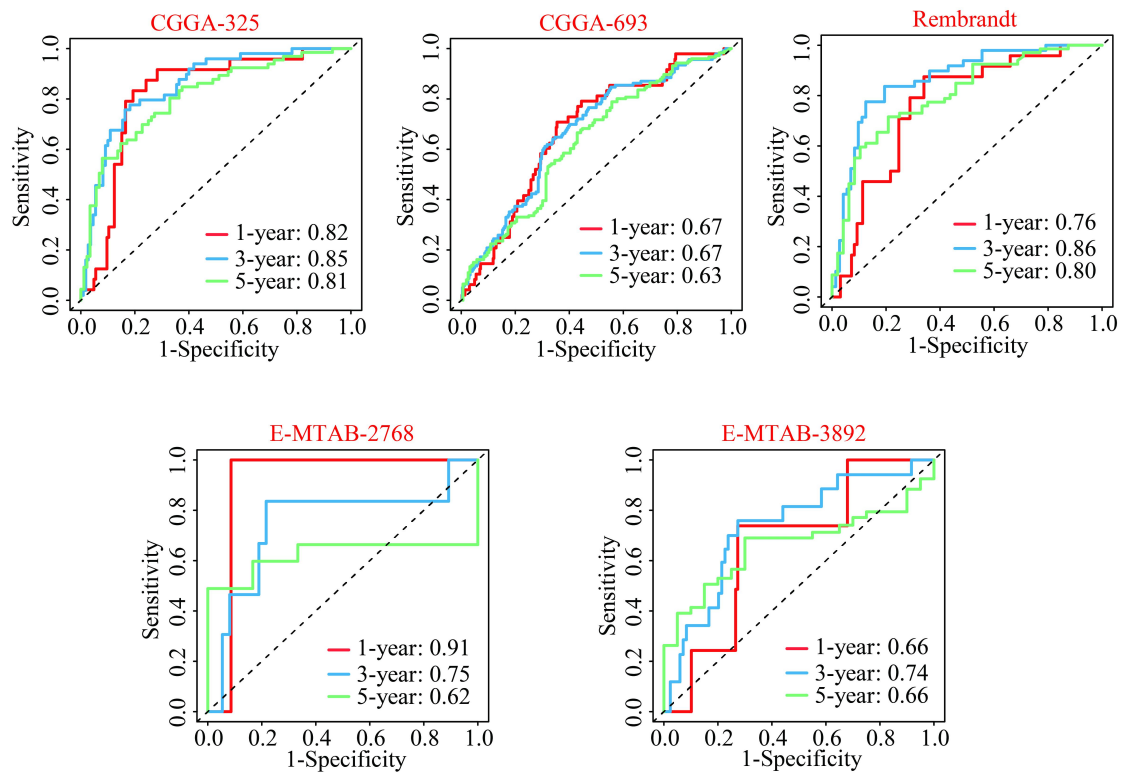

**Figure S2.** The AUC of 1-, 3-, and 5-year OS in CGGA-325, CGGA-693, Rembrandt,

E-MATB-2768 and E-MATB-3892 datasets, respectively.

ABI1

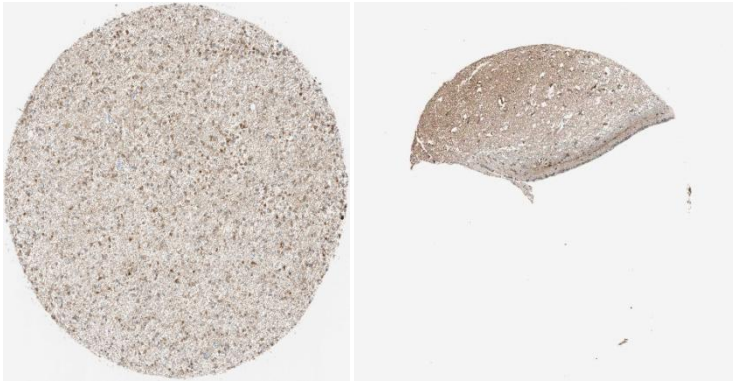

CAB008375

LGG tissue

Staining: Medium

Intensity: Moderate

Quality: > 75%

CAB008375

Normal tissue

Staining: Low

Intensity: Moderate

Quality: < 25%

BRCA1

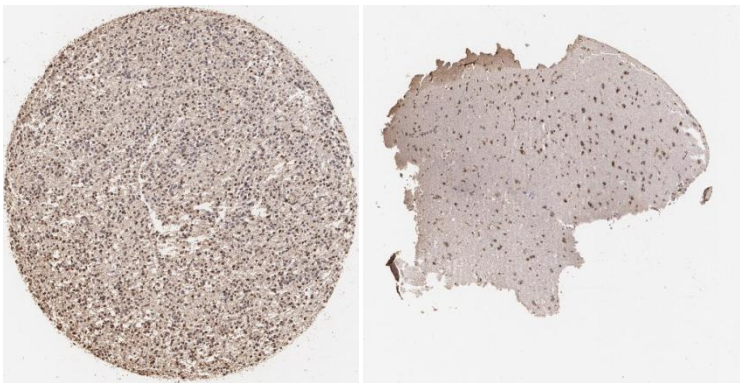

CAB001946

LGG tissue

Staining: Medium

Intensity: Moderate

Quality: 75% ~ 25%

CAB001946

Normal tissue

Staining: Low

Intensity: Moderate

Quality: < 25%

---

## CAPG

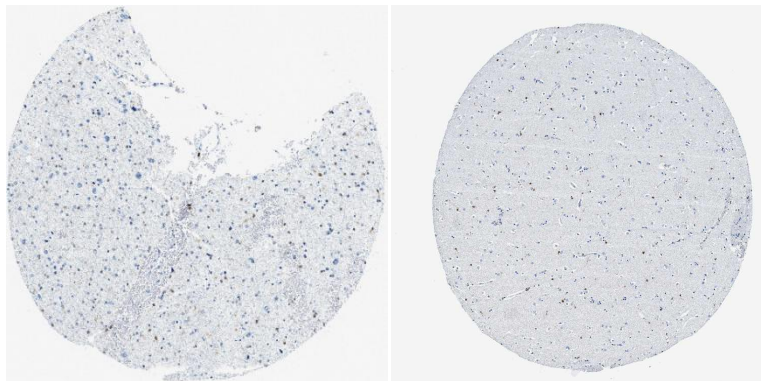

**HPA019092**

LGG tissue

Staining: Low

Intensity: Moderate

Quality: < 25%

**HPA019092**

Normal tissue

Staining: Not detected

Intensity: Weak

Quality: < 25%

## EIF3D

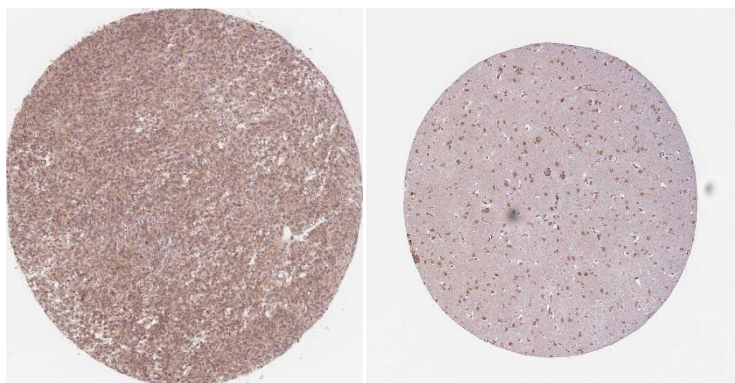

**HPA066216**

LGG tissue

Staining: Medium

Intensity: Moderate

Quality: > 75%

**HPA066216**

Normal tissue

Staining: Low

Intensity: Moderate

Quality: < 25%

## FLNA

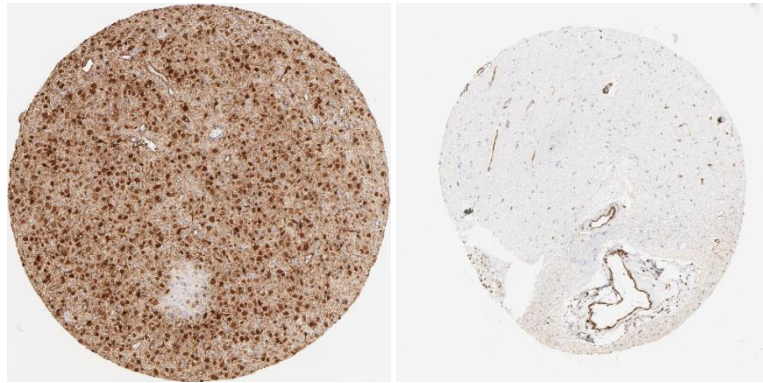

**HPA002925**

**HPA002925**

LGG tissue

Normal tissue

**Staining: High**

**Staining: Low**

Intensity: Strong

Intensity: Weak

Quality: > 75%

Quality: > 75%

**Figure S3.** The expression of five AR-related genes between LGG and corresponding normal tissues at the protein level.

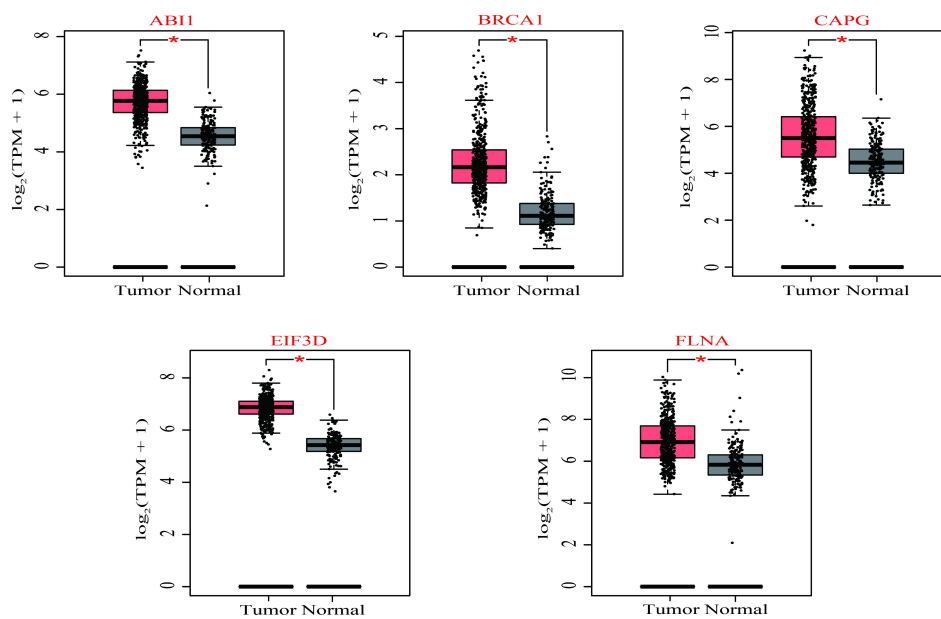

**Figure S4.** The expression of five AR-related genes between tumor and normal tissues via GEPIA database.

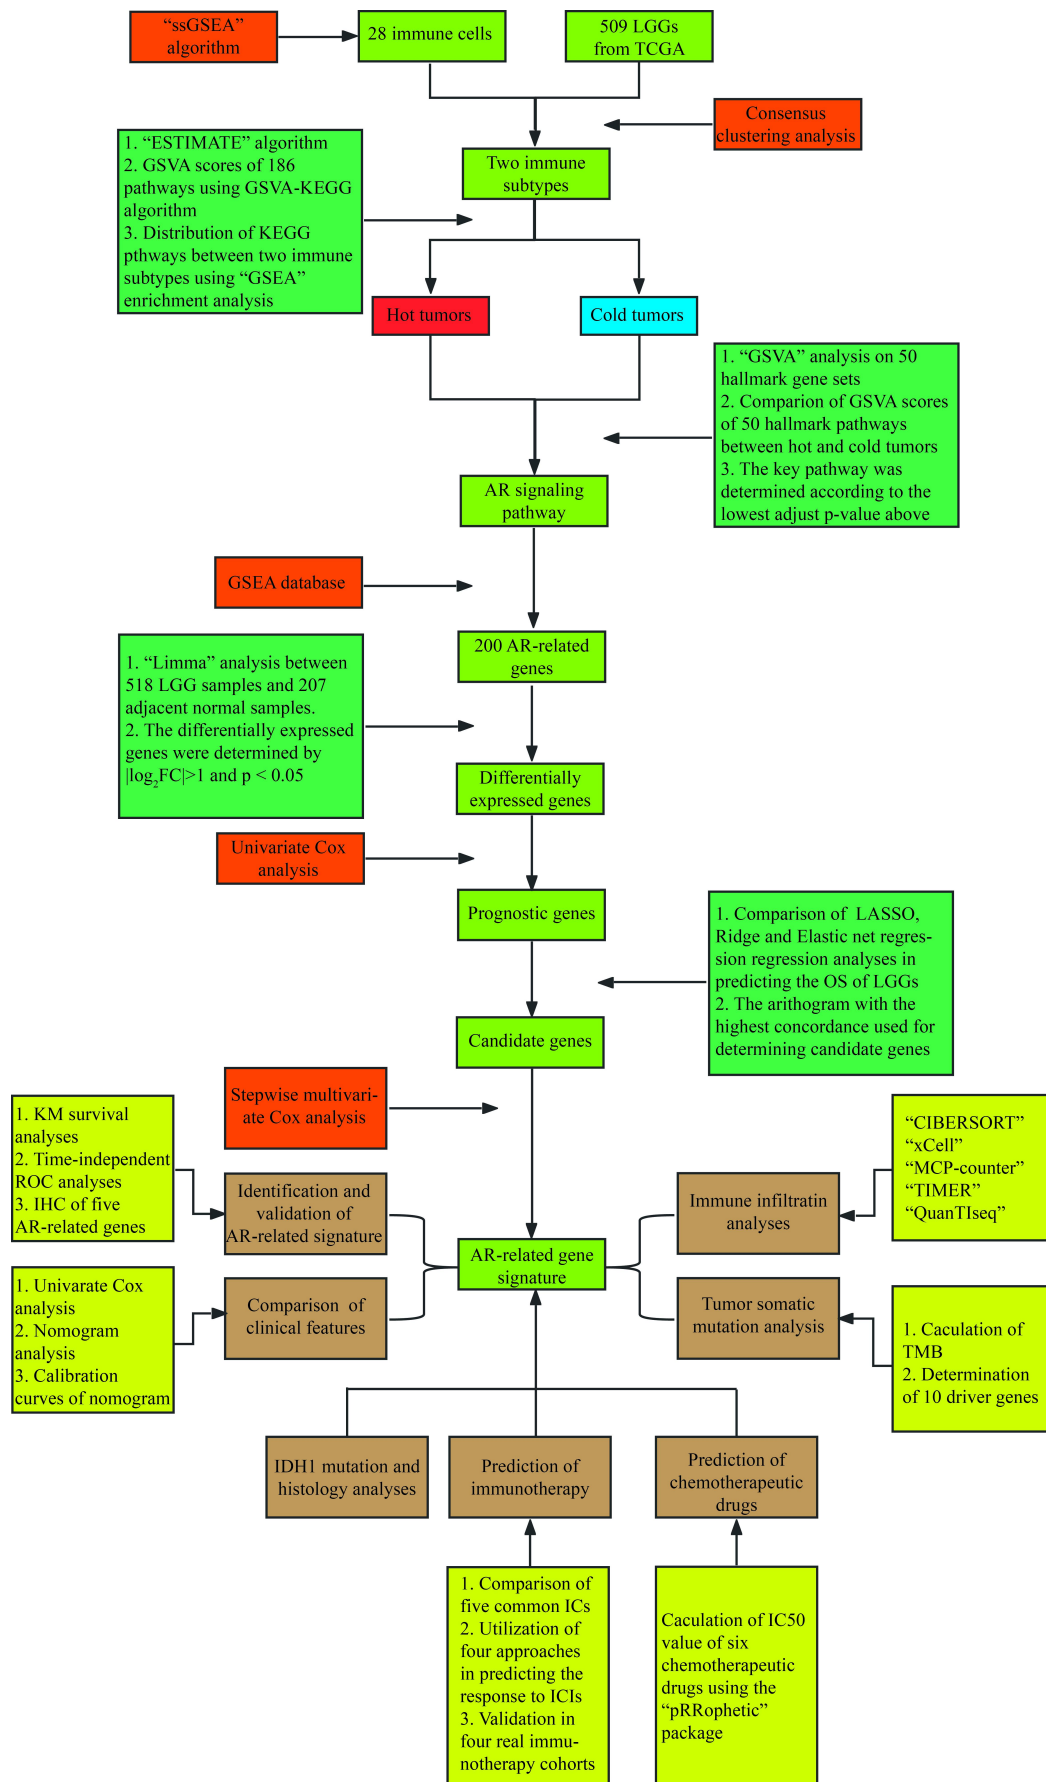

**Figure S5.** The flow chart in this study.
